# Supplementary material for: Morphology-controlled synthesis of SnO2/C hollow core–shell nanoparticle aggregates with improved lithium storage
Source: Royal Society of Chemistry journal article supplement (doi:10.1039/c3ta00949a), 2013-01-01
Supplement: c3ta00949a.pdf [file c3ta00949a.pdf]

## Electronic Supplementary Information

GC spectra from the reaction of solvothermal alcoholysis (Fig. S1), XRD of the resulting graphitized carbon (Fig. S2), SEM image of the resulting carbon (Fig. S3)

5

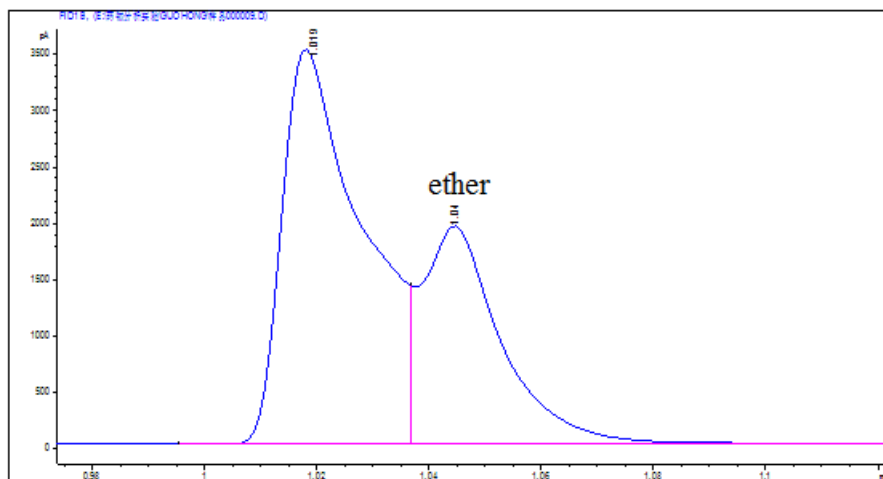

Fig. S1. GC spectra from the reaction of solvothermal alcoholysis. (after 6 h of reaction time).

10

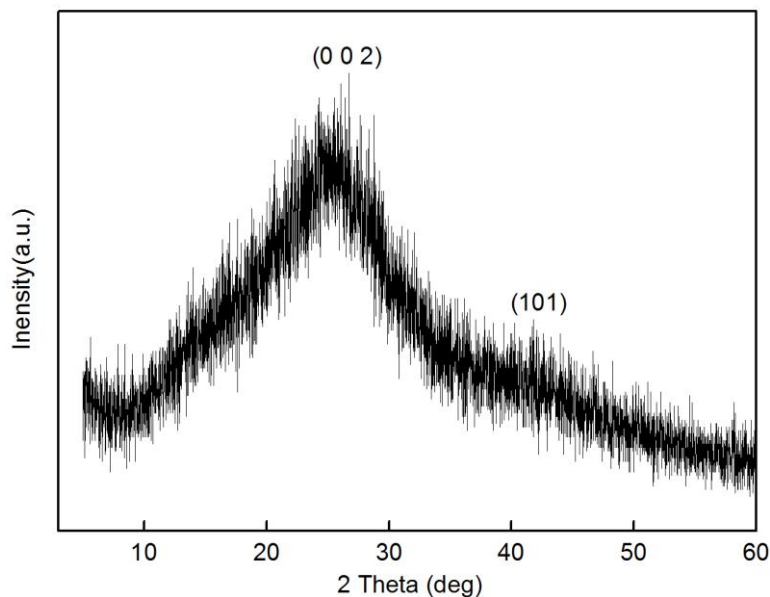

Fig. S2. XRD of the resulting graphitized carbon after 98 wt%  $\text{H}_2\text{SO}_4$  was used to remove the  $\text{SnO}_2$ .

15

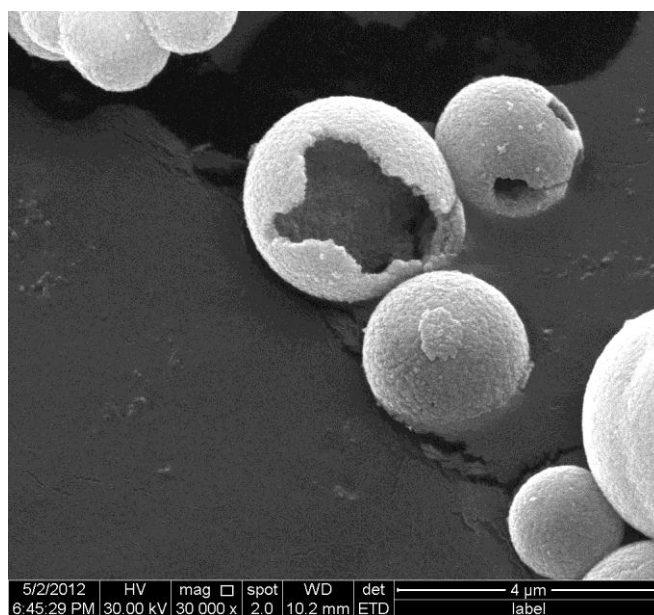

20

Fig. S3. SEM image of the resulting graphitized carbon after 98 wt% H<sub>2</sub>SO<sub>4</sub> was used to remove the SnO<sub>2</sub>.
